# Supplementary material for: Evaluating the Performance of ChatGPT in Ophthalmology: An Analysis of its Successes and Shortcomings
Source: bioRxiv or medRxiv preprint supplement (doi:10.1101/2023.01.22.23284882), 2023-01-26
Supplement: Supplementary file [file media-1.pdf]

**Supplemental Table 1: ChatGPT's performance per exam section of each of the BCSC and OphthoQuestions testing sets**

|                                                                 | <b>BCSC (n=260)</b>  | <b>OphthoQuestions (n=260)</b> | <b>P value*</b> |
|-----------------------------------------------------------------|----------------------|--------------------------------|-----------------|
| <b>General Medicine</b><br>Correct<br>Incorrect                 | 15 (75%)<br>5 (25%)  | 15 (75%)<br>5 (25%)            | 1.000           |
| <b>Fundamentals</b><br>Correct<br>Incorrect                     | 11 (55%)<br>9 (45%)  | 13 (65%)<br>7 (35%)            | 0.748           |
| <b>Clinical Optics</b><br>Correct<br>Incorrect                  | 12 (60%)<br>8 (40%)  | 5 (25%)<br>15 (75%)            | 0.054           |
| <b>Pathology and Intraocular Tumors</b><br>Correct<br>Incorrect | 8 (40%)<br>12 (60%)  | 9 (45%)<br>11 (55%)            | 1.000           |
| <b>Neuro-ophthalmology</b><br>Correct<br>Incorrect              | 8 (40%)<br>12 (60%)  | 2 (10%)<br>18 (90%)            | 0.065           |
| <b>Pediatrics and Strabismus</b><br>Correct<br>Incorrect        | 13 (65%)<br>7 (35%)  | 4 (20%)<br>16 (80%)            | 0.010**         |
| <b>Oculoplastics</b><br>Correct<br>Incorrect                    | 10 (50%)<br>10 (50%) | 8 (40%)<br>12 (60%)            | 0.751           |
| <b>Cornea</b><br>Correct<br>Incorrect                           | 12 (60%)<br>8 (40%)  | 12 (60%)<br>8 (40%)            | 1.000           |
| <b>Uveitis</b><br>Correct<br>Incorrect                          | 7 (35%)<br>13 (65%)  | 13 (65%)<br>7 (35%)            | 0.113           |

|                                                    |                      |                     |       |
|----------------------------------------------------|----------------------|---------------------|-------|
| <b>Glaucoma</b><br>Correct<br>Incorrect            | 10 (50%)<br>10 (50%) | 5 (25%)<br>15 (75%) | 0.191 |
| <b>Lens and Cataract</b><br>Correct<br>Incorrect   | 13 (65%)<br>7 (35%)  | 9 (45%)<br>11 (55%) | 0.341 |
| <b>Retina and Vitreous</b><br>Correct<br>Incorrect | 15 (75%)<br>5 (25%)  | 8 (40%)<br>12 (60%) | 0.054 |
| <b>Refractive Surgery</b><br>Correct<br>Incorrect  | 11 (55%)<br>9 (45%)  | 8 (40%)<br>12 (60%) | 0.527 |

\*Fisher's Exact test

\*\*Statistically significant at the 0.05 level
