# Supplementary material for: Evaluating the Performance of ChatGPT in Ophthalmology: An Analysis of its Successes and Shortcomings
Source: bioRxiv or medRxiv preprint supplement (doi:10.1101/2023.01.22.23284882), 2023-01-26

**Supplemental Figure 1: Post hoc analysis using Tukey's test to isolate the effect of exam section and difficulty index using all questions. (A)** Bar plot of the percentage of accuracy by exam section. The blue square brackets identify the significant differences. The significant contrasts were the following: General Medicine – Glaucoma (estimate 0.424,  $p=0.002$ ), General Medicine - Neuro-Ophthalmology (estimate 0.486,  $p<0.001$ ) and General Medicine - Pathology and Tumors (estimate 0.367,  $p=0.029$ ). **(B)** Predicted percentage of accuracy by difficulty index. Accuracy increased with increasing difficulty index (easier questions).

**(A)**

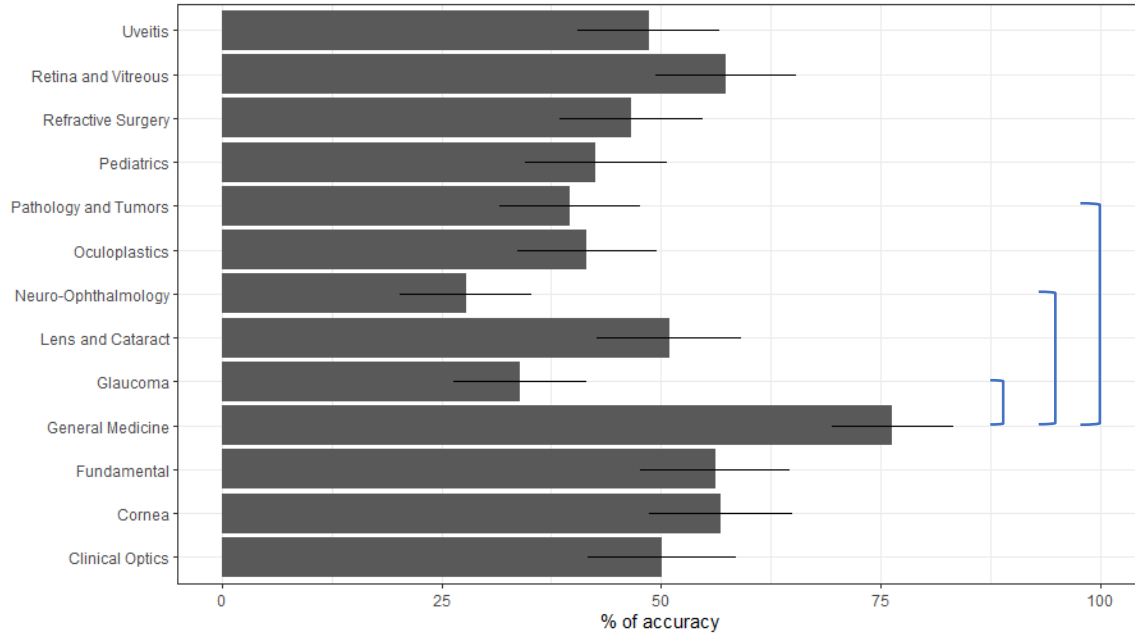

**(B)**

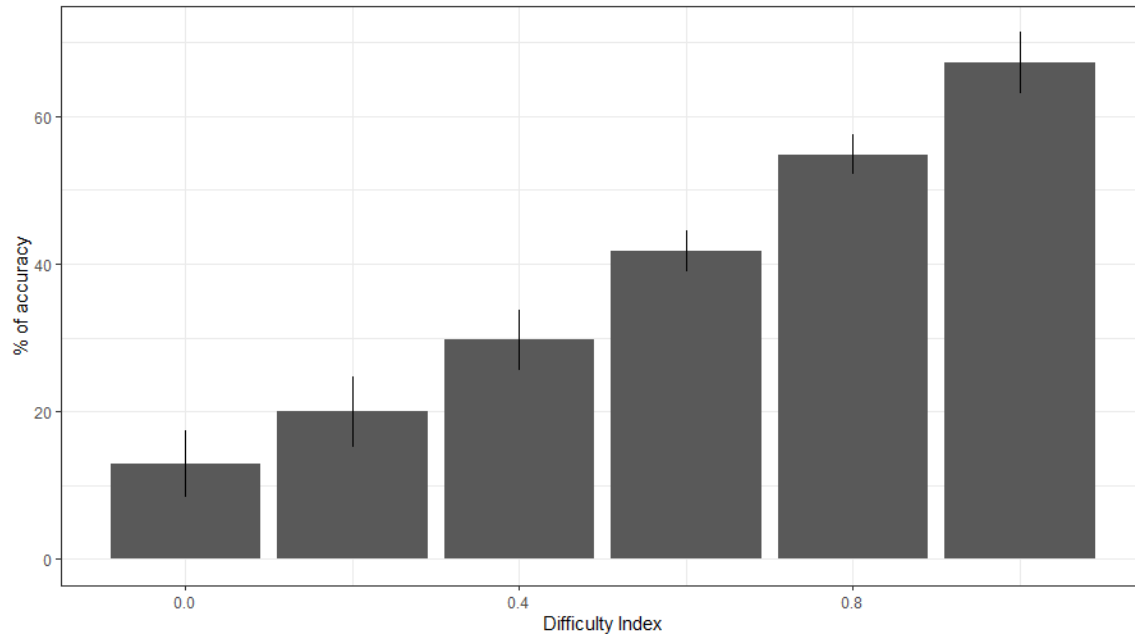

Supplement: Supplementary file [file media-3.pdf]
