# Supplementary material for: Evaluating the Performance of ChatGPT in Ophthalmology: An Analysis of its Successes and Shortcomings
Source: bioRxiv or medRxiv preprint supplement (doi:10.1101/2023.01.22.23284882), 2023-01-26

**Supplemental Figure 3: Post hoc analysis using Tukey's test to isolate the effect of exam section and difficulty index using the OphthoQuestions questions. (A)**

Bar plot of the percentage of accuracy by exam section. The blue square brackets identify the significant differences. The significant contrasts were the following: Clinical Optics - General Medicine (estimate -0.501,  $p=0.028$ ), Cornea - Neuro-Ophthalmology (estimate 0.506,  $p=0.013$ ), Fundamentals - Neuro-Ophthalmology (estimate 0.518,  $p=0.016$ ), General Medicine - Glaucoma (estimate 0.538,  $p=0.004$ ), General Medicine - Neuro-Ophthalmology (estimate 0.638,  $p<0.001$ ), General Medicine - Pediatrics (estimate 0.552,  $p=0.004$ ) and Neuro-Ophthalmology- Uveitis (estimate -0.536,  $p=0.004$ ). **(B)** Predicted percentage of accuracy by difficulty index. Accuracy increased with increasing difficulty index (easier questions).

**(A)**

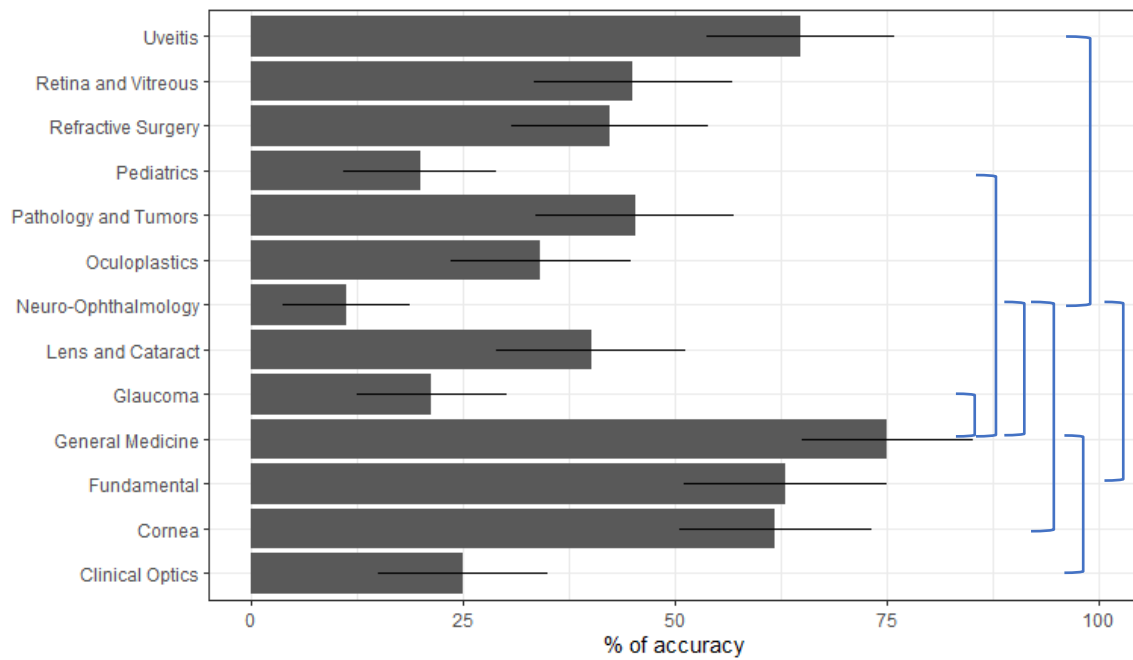

**(B)**

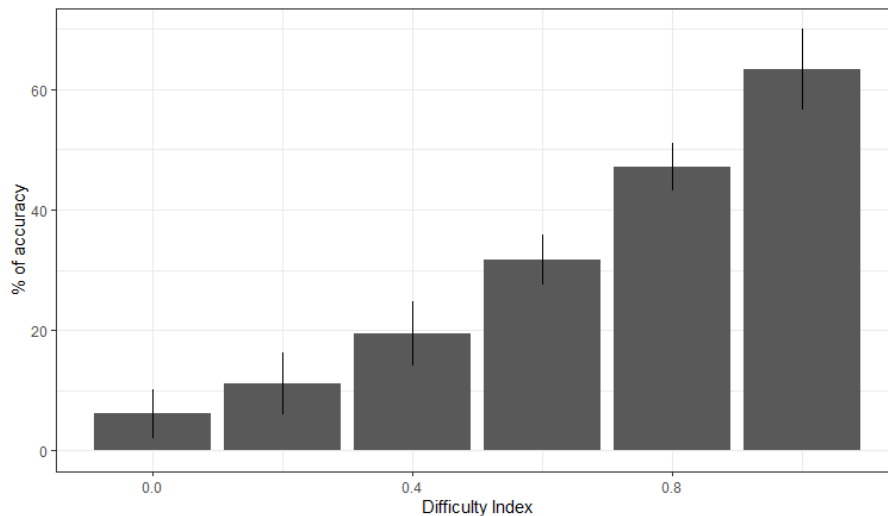

Supplement: Supplementary file [file media-5.pdf]
